# Supplementary material
Source: Research Square preprint supplement (doi:10.21203/rs.3.rs-10184078/v1)
Supplement: Supplementary file 1 [file 608c13519bf1a96b3c133a66.xlsx]

## Sheet: Sheet1
教师ID	学科领域	教龄	职称	技术背景	总使用频次	总使用时长(分钟)	活跃天数	使用功能类别数	备课工具	效率工具	评阅工具	分析工具	职业生涯规划	AI辅导员	论文写作	个人知识库	共享知识库	知识库广场	主要使用时段	工作日/周末使用比	持续使用周数
T001	理工科	8	副教授	熟练者	47	385	18	3	15	8	12	9	0	0	3	5	2	1	晚上	0.85	12
T002	人文社科	22	教授	初学者	8	45	5	1	3	0	4	1	0	0	0	0	0	0	下午	0.6	4
T003	经管	5	讲师	熟练者	28	210	12	2	6	5	10	6	1	0	0	3	2	1	晚上	0.9	8
T004	医学	15	副教授	熟练者	12	95	7	2	2	3	5	2	0	0	0	2	1	0	上午	0.75	5
T005	艺术	3	助教	专家	63	520	22	3	18	12	15	13	2	3	5	8	5	4	全天	0.88	14
T006	理工科	12	教授	熟练者	22	180	10	2	5	4	8	3	0	0	2	2	1	0	下午	0.8	6
T007	人文社科	6	讲师	初学者	35	260	15	2	12	6	10	4	3	2	0	3	2	1	晚上	0.82	10
T008	农学	25	教授	初学者	5	35	3	1	2	1	2	0	0	0	0	0	0	0	上午	1	2
T009	理工科	4	助教	专家	71	610	25	3	20	15	18	10	2	2	4	10	6	5	全天	0.85	16
T010	医学	10	副教授	熟练者	16	130	8	2	3	2	6	3	1	0	1	2	1	0	上午	0.78	7
T011	人文社科	18	副教授	熟练者	29	240	13	3	8	5	7	4	0	0	5	6	3	2	下午	0.88	9
T012	经管	8	讲师	熟练者	45	350	19	2	10	12	14	7	2	0	0	5	3	2	晚上	0.92	11
T013	艺术	2	助教	初学者	50	420	20	3	15	10	12	8	5	4	3	7	5	4	全天	0.8	12
T014	体育	15	副教授	初学者	9	70	6	1	4	2	3	0	0	0	0	0	0	0	下午	0.65	4
T015	理工科	7	讲师	熟练者	38	310	16	3	9	8	11	6	1	1	2	6	4	3	晚上	0.9	10

## Sheet: Sheet2
	总使用频次	总使用时长	活跃天数	使用功能类别数	持续使用周数
总使用频次	1
总使用时长	0.982	1
活跃天数	0.913	0.885	1
使用功能类别数	0.834	0.816	0.766	1
持续使用周数	0.872	0.858	0.901	0.712	1
备课工具	0.956	0.943	0.856	0.783	0.823
效率工具	0.923	0.911	0.812	0.754	0.791
评阅工具	0.941	0.928	0.839	0.771	0.812
分析工具	0.898	0.885	0.794	0.732	0.768
个人知识库	0.867	0.854	0.773	0.718	0.745
共享知识库	0.812	0.799	0.726	0.681	0.698
知识库广场	0.785	0.772	0.704	0.658	0.675
论文写作	0.723	0.711	0.645	0.602	0.623
AI辅导员	0.654	0.642	0.584	0.545	0.564
职业生涯规划	0.587	0.576	0.524	0.489	0.507
技术背景_专家	0.512	0.503	0.457	0.426	0.442
技术背景_熟练者	0.345	0.339	0.308	0.287	0.298
主要使用时段_全天	0.423	0.416	0.378	0.352	0.365
主要使用时段_晚上	0.287	0.282	0.256	0.239	0.248
职称_助教	0.234	0.23	0.209	0.195	0.202
学科领域_艺术	0.198	0.195	0.177	0.165	0.171
教龄	-0.156	-0.153	-0.139	-0.13	-0.135
学科领域_农学	-0.167	-0.164	-0.149	-0.139	-0.144
职称_教授	-0.189	-0.186	-0.169	-0.158	-0.164
技术背景_初学者	-0.324	-0.318	-0.289	-0.27	-0.28
主要使用时段_上午	-0.256	-0.252	-0.229	-0.214	-0.222

## Sheet: Sheet3
	备课工具	效率工具	评阅工具	分析工具	个人知识库	共享知识库	知识库广场	论文写作	AI辅导员	职业生涯规划	工作日/周末
备课工具	1	0.856	0.901	0.843	0.812	0.763	0.738	0.674	0.611	0.548	0.234
效率工具	0.856	1	0.832	0.879	0.783	0.735	0.711	0.648	0.588	0.528	0.218
评阅工具	0.901	0.832	1	0.817	0.795	0.747	0.723	0.659	0.598	0.537	0.227
分析工具	0.843	0.879	0.817	1	0.768	0.721	0.698	0.636	0.577	0.518	0.213
个人知识库	0.812	0.783	0.795	0.768	1	0.941	0.911	0.83	0.753	0.676	0.205
共享知识库	0.763	0.735	0.747	0.721	0.941	1	0.967	0.781	0.708	0.636	0.193
知识库广场	0.738	0.711	0.723	0.698	0.911	0.967	1	0.756	0.686	0.616	0.187
论文写作	0.674	0.648	0.659	0.636	0.83	0.781	0.756	1	0.907	0.815	0.175
AI辅导员	0.611	0.588	0.598	0.577	0.753	0.708	0.686	0.907	1	0.898	0.159
职业生涯规划	0.548	0.528	0.537	0.518	0.676	0.636	0.616	0.815	0.898	1	0.143
工作日/周末	0.234	0.218	0.227	0.213	0.205	0.193	0.187	0.175	0.159	0.143	1
